# Supplementary material
Source: PubMed Central journal article supplement (PMC1087998)

**Figure 1: Sucrose density gradient profiles of WT and *npq2* thylakoids and gel electrophoresis of gradient fractions.** *Upper:* thylakoids from WT and *npq2* plants were solubilized with  $\alpha$ -DM and loaded on sucrose gradient; five fractions (indicated) were harvested from each gradient. *Lower:* Tris-Tricine SDS-PAGE analysis of the five bands (1-5) from sucrose gradient. Main protein components of each fraction are indicated (Caffarri et al., 2001). See Materials and methods for details. Figure abbreviations: B, band; Til, thylakoids; MW, molecular weight marker.

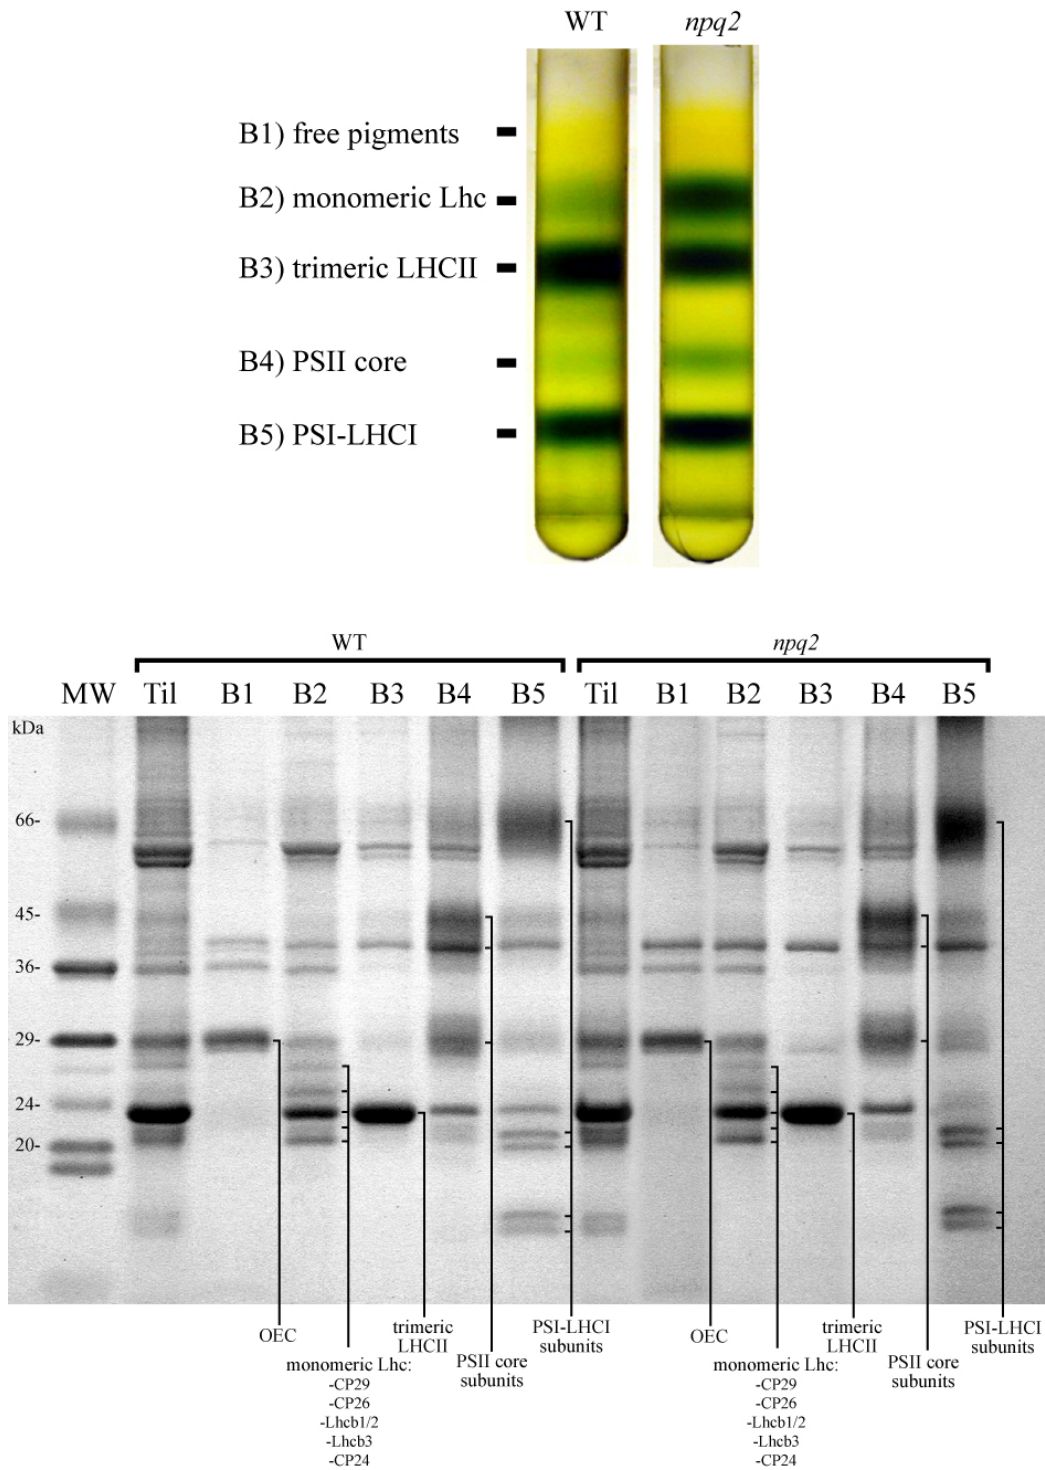

Supplement: plntcell_tpc.104.030601_1.pdf [file plntcell_tpc.104.030601_1.pdf]
