# Supplementary material
Source: PubMed Central journal article supplement (PMC1087998)

**Figure 2: Flat bed isoelectric focusing fractionation.** *Upper:* purification of monomeric Lhcb by preparative, flat-bed isoelectric focusing (Dainese et al., 1990), isolated from WT and *npq2* thylakoids by sucrose gradient ultracentrifugation. *Lower:* Tris-Tricine SDS-PAGE analysis of fractions harvested from IEF. Protein composition of each fraction is indicated. After the run, gel was stained with Coomassie blue. See Materials and methods for details. Figure abbreviations: Fr, fraction; Til, thylakoids; MW, molecular weight marker.

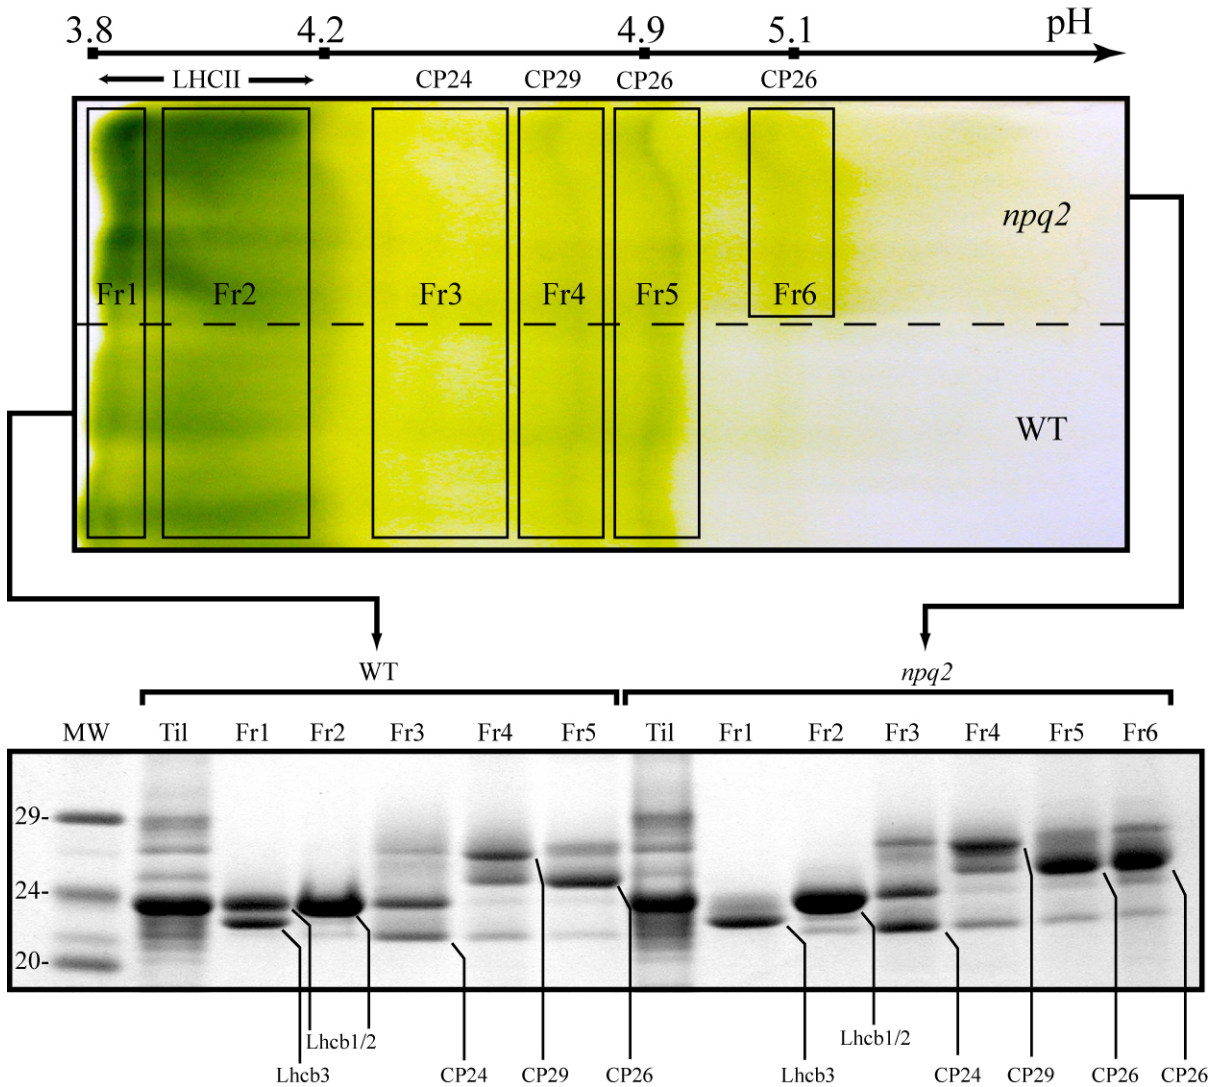

Supplement: plntcell_tpc.104.030601_2.pdf [file plntcell_tpc.104.030601_2.pdf]
