# Supplementary material
Source: PubMed Central journal article supplement (PMC1087998)

**Figure 3: Gel electrophoresis of sucrose gradient fractions isolated from WT and *lhcb5* mutant thylakoids.** Thylakoids were isolated from WT and *lhcb5* plants and solubilized with  $\alpha$ -DM (see Methods); Lhcb proteins were obtained by sucrose gradient ultracentrifugation. Protein composition of each sample is indicated. After the electrophoretic run, gel was stained with Coomassie blue. Figure abbreviations: MW, molecular weight marker.

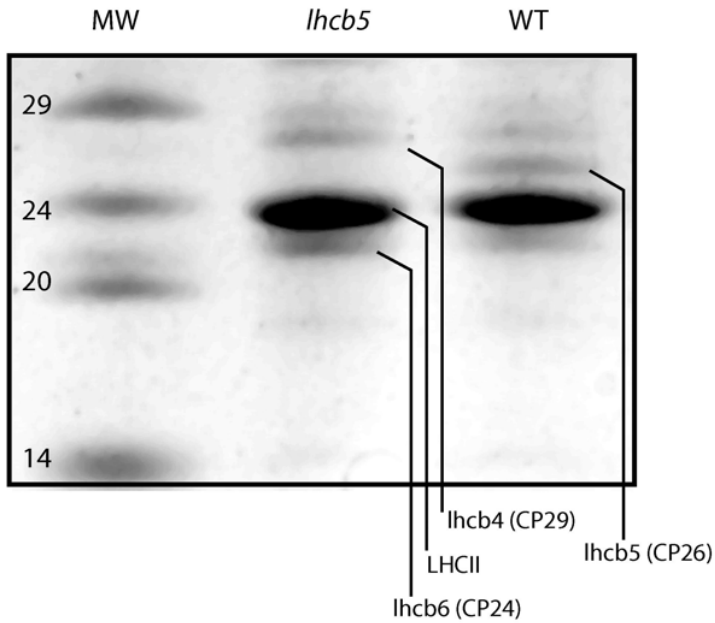

Supplement: plntcell_tpc.104.030601_3.pdf [file plntcell_tpc.104.030601_3.pdf]
