# Supplementary material
Source: PubMed Central journal article supplement (PMC1087998)
Supplement: plntcell_tpc.104.030601_4.pdf [file plntcell_tpc.104.030601_4.pdf]

Supplemental Reference List

**Caffarri,S., Croce,R., Breton,J., and Bassi,R.** (2001) The major antenna complex of photosystem II has a xanthophylls binding site not involved in light harvesting. *J.Biol.Chem.* **276**:35924-35933.

**Dainese,P., Hoyer-hansen,G., and Bassi,R.** (1990) The resolution of chlorophyll a/b binding proteins by a preparative method based on flat bed isoelectric focusing. *Photochem.Photobiol.* **51**:693-703.
