# Supplementary material
Source: PubMed Central journal article supplement (PMC1087998)
Supplement: plntcell_tpc.104.030601_5.pdf [file plntcell_tpc.104.030601_5.pdf]

**Table****Table 1. Photosynthetic parameters  $F_o$ ,  $F_m$  and  $F_v/F_m$  measured on *Arabidopsis thaliana* WT and mutant genotypes.** Parameters were obtained from measures on whole-leaf, with a PAM fluorimeter (see Materials and methods) and expressed as mean  $\pm$  SD.

|                  | $F_o$            | $F_m$              | $F_v/F_m$       |
|------------------|------------------|--------------------|-----------------|
| WT               | 386,0 $\pm$ 88,9 | 1930,9 $\pm$ 159,2 | 0,80 $\pm$ 0,08 |
| <i>npq1</i>      | 328,2 $\pm$ 48,2 | 1899,9 $\pm$ 95,6  | 0,83 $\pm$ 0,07 |
| <i>npq2</i>      | 209,1 $\pm$ 51,5 | 1377,0 $\pm$ 61,3  | 0,84 $\pm$ 0,07 |
| <i>npq4</i>      | 366,9 $\pm$ 32,5 | 1932,9 $\pm$ 76,6  | 0,81 $\pm$ 0,05 |
| <i>npq1xnpq4</i> | 360,9 $\pm$ 20,2 | 1890,4 $\pm$ 32,4  | 0,81 $\pm$ 0,03 |
| <i>npq2xnpq4</i> | 271,0 $\pm$ 21,1 | 1455,3 $\pm$ 51,5  | 0,81 $\pm$ 0,04 |
